# Supplementary material for: A hierarchical origami moisture collector with laser-textured microchannel array for a plug-and-play irrigation system
Source: Royal Society of Chemistry journal article supplement (doi:10.1039/d0ta11975j), 2021-01-01
Supplement: d0ta11975j6.pdf [file d0ta11975j6.pdf]

## Supplementary Information

### **A hierarchical origami moisture collector with laser-textured microchannel array for a plug-and-play irrigation system**

*Xiaoxuan Tang, Hongwei Liu, Lin Xiao, Maolin Zhou, Haoyu Bai, Jiahao Fang, Zehang Cui, Hui Cheng, Guoqiang Li\*, Yabin Zhang\* and Moyuan Cao\**

This file contains **4** supporting figures, **2** table and **5** movies.

### Supporting Figures:

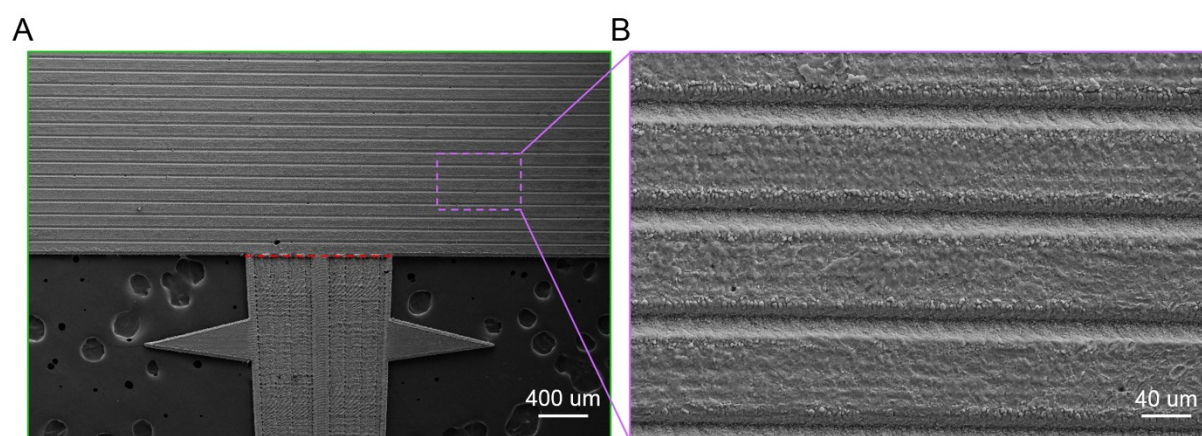

**Figure S1** The SEM images of the HOMC. **A)** The joint of the STGC and SGI. The red line dotted line represents the fold line. **B)** The microstructure on SGI.

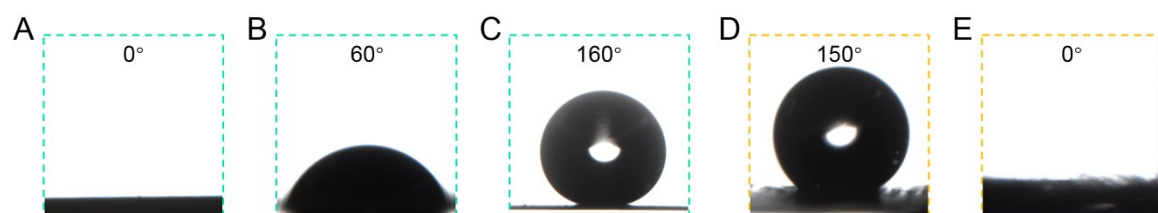

**Figure S2.** The water contact angle of (A) the laser-treated Al surfaces (including the main structure of the STGC, STC, SGC, SC, SGI, SGS and SS), (B) the original Al surface, (C) the chemically modified Al surface, (D) the outside surface of the leaf sheath, and (E) the trichomes array on the sheath.

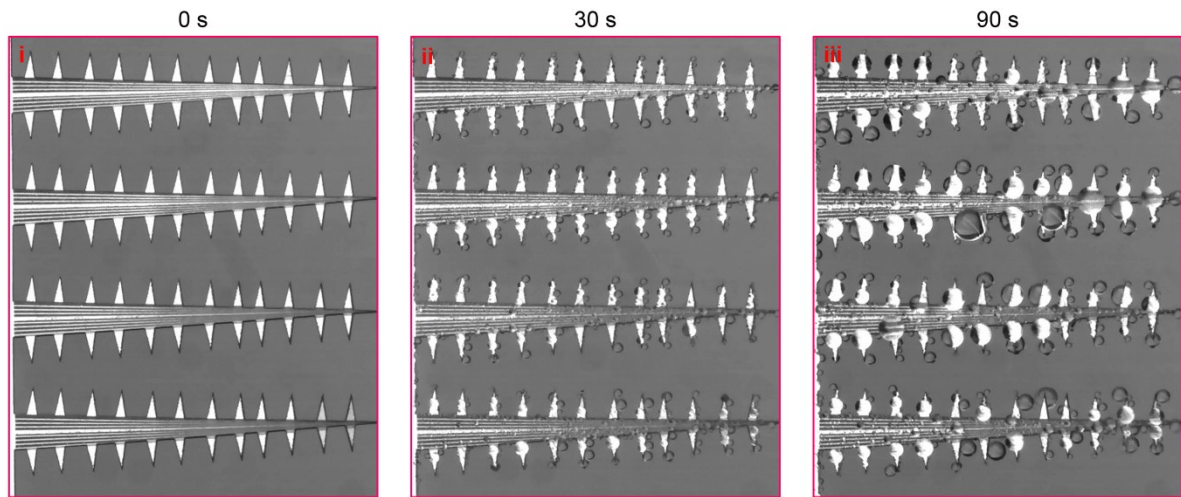

**Figure S3.** The optical images of whole fog harvesting process on the superhydrophobic STGC samples. i-iii) the fogdrop captured on the surface agglomerate into spherical shape and merge continuously, blocking the path for transportation.

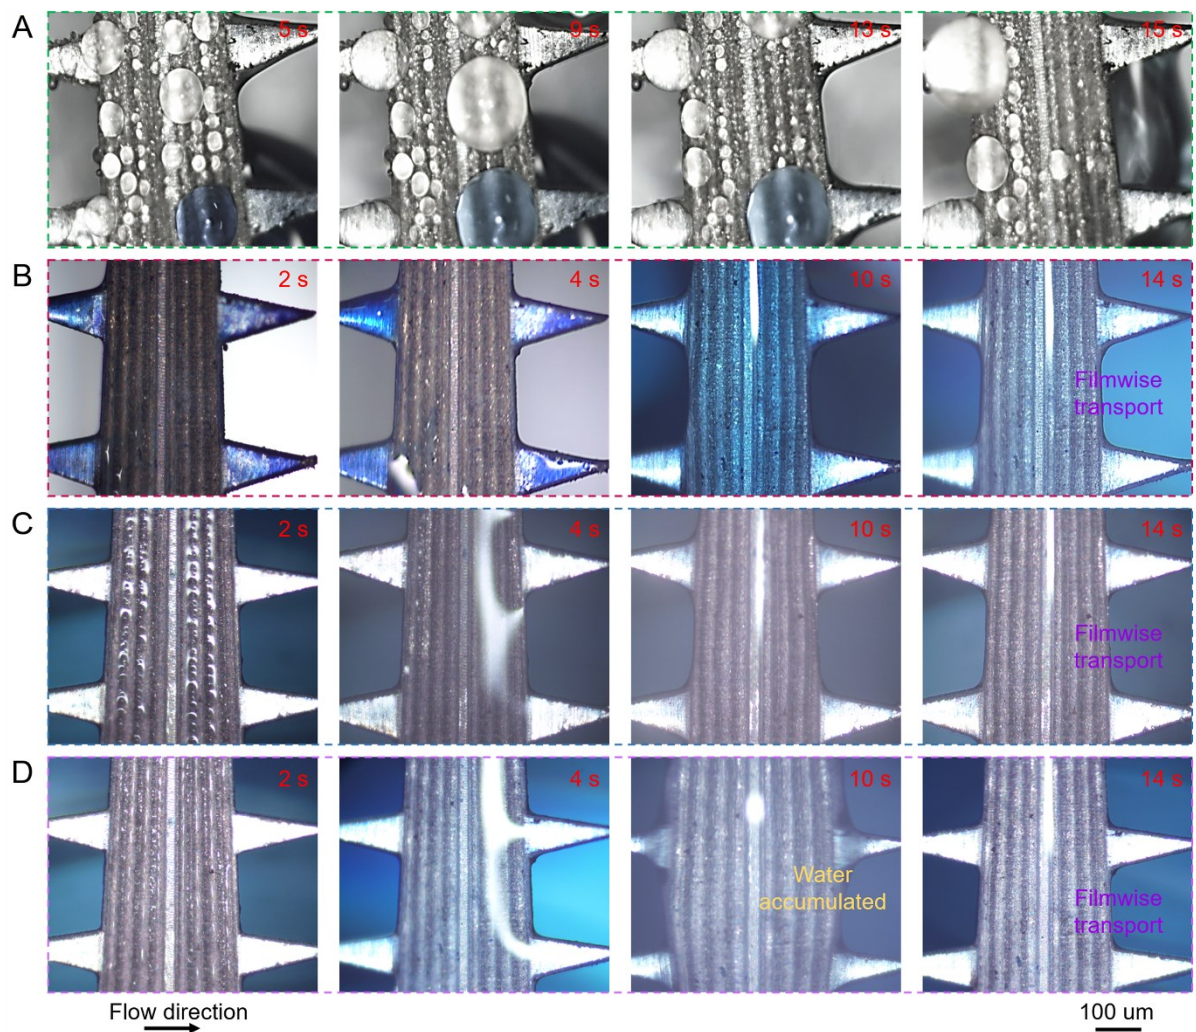

**Figure S4.** The optical images of SFHC with different fog flow velocity. **A)** the hydrophobic SFHC in 1 m/s flow velocity. **B)** the SFHC in 0.45 m/s fog flow velocity. **C)** the SFHC in 1 m/s fog flow velocity. **D)** the SFHC in 2 m/s fog flow velocity.

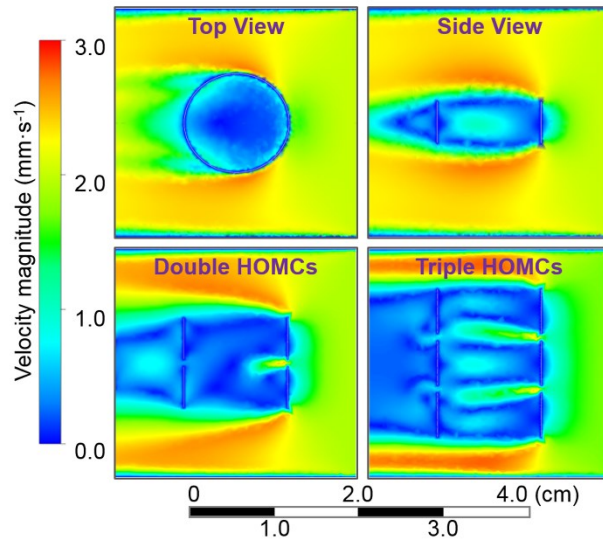

**Figure S5.** The simulation of wind fields inside the HOMC from the assembled collector from single HOMC and triple HOMCs. The wind field distribution image was simulated by Ansys Fluent software. The initial wind speed was set at 2.5 m/s which is same as the normal natural environment wind.

**Table S1.** Detailed geometric parameters of HOMC.

| $L_s$ | $L_t$  | $H$              | $h$              | $w$              | $D$   | $d$              | $s$              | $H_w$ | $\alpha$ | $\beta$ | $\delta$ | $\gamma$ |
|-------|--------|------------------|------------------|------------------|-------|------------------|------------------|-------|----------|---------|----------|----------|
| 13 mm | 0.7 mm | 50 $\mu\text{m}$ | 25 $\mu\text{m}$ | 55 $\mu\text{m}$ | 13 mm | 40 $\mu\text{m}$ | 60 $\mu\text{m}$ | 5 mm  | 6°       | 22.5°   | 18°      | 90°      |

The detailed geometric parameters of the HOMC are listed in Table S1. Both the spine and thorns are in the wedge shape. The apex angles of the spine ( $\alpha$ ) and thorn ( $\beta$ ) are 6° and 22.5°, respectively. Twelve thorns were orderly distributed on two sides of spine. The length of spine ( $L_s$ ) and thorns ( $L_t$ ) are 13 mm and 0.7 mm, respectively. Gradient microchannels with high and low ribs are aligned along spine on top surface of the STGC. Inclined angle of the channels ( $\delta$ ) and the grooves on the SGI is 18°. These channels formed by two neighboring high ribs are named as the major channel and the minor channels formed with any low ribs. Totally 2 major channels and 8 minor channels formed by 3 high ribs and 6 low ribs. The width and height of channels along the spine gradually decrease from the tip to the base. The heights of high ribs ( $H$ ) and low ribs ( $h$ ) at the end of spine are approximately 50  $\mu\text{m}$  and 25  $\mu\text{m}$ , respectively. The width of each minor channels ( $w$ ) at the base is approximately 55  $\mu\text{m}$ . The angle between thorn and spine ( $\gamma$ ) is approximately 90°. Diameter ( $D$ ) of the crown are 13 mm. The depth ( $d$ ) of grooves on the SGI is 40  $\mu\text{m}$ . The space ( $s$ ) between each grooves is 60  $\mu\text{m}$ . The height of annular thin-wall ( $H_w$ ) of the HOMC are 5 mm.



| Fog-collecting system                            | Main methods                  | Mechanism                      | Flow velocity (cm/s) | Ambient temperature (T) | Humidity (rh) | Collection efficiency (g/cm <sup>2</sup> ·h) | Ref.      |
|--------------------------------------------------|-------------------------------|--------------------------------|----------------------|-------------------------|---------------|----------------------------------------------|-----------|
| Wheat awn-like system                            | 3D printing                   | Shape gradient                 | 40                   | 25 °C                   | 95%           | ≈5.90                                        | 1         |
| Star-shaped wettability patterned surfaces       | Spin-coating                  | Wettability gradient           | N/A                  | Room temperature        | 95%           | ≈2.78                                        | 2         |
| Superwettability patterned surfaces              | Pulsed laser deposition       | Wettability gradient           | N/A                  | Room temperature        | 95%           | ≈5.30                                        | 3         |
| Hybrid wettability surface                       | Femtosecond-laser             | Wettability gradient           | 10                   | 20 °C                   | 95%           | ≈0.2                                         | 4         |
| Hydrophobic/hydrophilic cooperative Janus system | Chemical modification         | Janus system                   | 70                   | Room temperature        | 95%           | ≈0.93                                        | 5         |
| Superhydrophilic/hydrophobic Janus foam          | Femtosecond-laser             | Janus system                   | 50                   | Room temperature        | 95%           | ≈3.7                                         | 6         |
| Nanocone-decorated 3D fiber network              | Nanocone decoration           | Shape gradient                 | 75                   | 0 °C                    | 95%           | ≈3.6                                         | 7         |
| Hydrophilic/superhydrophobic patterned surface   | Thermal pressing procedure    | Wettability gradient           | 12                   | 22 °C                   | 95%           | ≈0.16                                        | 8         |
| HOMC combination                                 | Femtosecond-laser and origami | Wettability and shape gradient | 45                   | 25 °C                   | 95%           | ≈8.4                                         | This work |

**Table S2.** Comparison of the fog-collecting systems with other works.

References in the table are shown below.

1. L. Xiao, G. Li, Y. Cai, Z. Cui, J. Fang, H. Cheng, Y. Zhang, T. Duan, H. Zang, H. Liu, S. Li, Z. Ni and Y. Hu, *Chem. Eng. J.*, 2020, **399**, 125139.
2. H. Bai, L. Wang, J. Ju, R. Sun, Y. Zheng and L. Jiang, *Adv. Mater.*, 2014, **26**, 5025-5030.
3. Z. Yu, F. F. Yun, Y. Wang, L. Yao, S. Dou, K. Liu, L. Jiang and X. Wang, *Small*, 2017, **13**, 1701403.
4. K. Yin, H. Du, X. Dong, C. Wang, J. A. Duan and J. He, *Nanoscale*, 2017, **9**, 14620-14626.



5. M. Cao, J. Xiao, C. Yu, K. Li and L. Jiang, *Small*, 2015, **11**, 4379-4384.
6. K. Yin, S. Yang, X. Dong, D. Chu, J. A. Duan and J. He, *ACS Appl. Mater. Interfaces*, 2018, **10**, 31433-31440.
7. C. Li, Y. Liu, C. Gao, X. Li, Y. Xing and Y. Zheng, *ACS Appl. Mater. Interfaces*, 2019, **11**, 4507-4513.
8. Y. Wang, L. Zhang, J. Wu, M. N. Hedhili and P. Wang, *J. Mater. Chem. A*, 2015, **3**, 18963-18969.

**Supplementary movies:**

**Movie S1:** The wetting and membrane formation processes on the STGC-1 and STGC-2

**Movie S2:** The water transport process on completely wetted STGC

**Movie S3:** The water evaporation process on the SGI.

**Movie S4:** The fogdrop collection process of the HOMC.

**Movie S5:** The fog harvesting process of the assembled collector from the HOMCs (top view and side view).
